# Supplementary material
Source: Royal Society of Chemistry journal article supplement (doi:10.1039/d6cp00283h)
Supplement: d6cp00283h1.pdf [file d6cp00283h1.pdf]

# Supporting Information for "Strain-tunable linear dichroism and second-harmonic generation response in $\text{TaOX}_2$ ( $X = \text{F}, \text{Cl}, \text{Br}$ ) monolayers: A first-principles study"

Yi-min Ding,<sup>†</sup> Qiang Wang,<sup>†</sup> Min Jiang,<sup>†</sup> Xiao-dan Liu,<sup>†</sup> Anqi Huang,<sup>\*,‡</sup> Qingfang  
Li,<sup>\*,¶</sup> and Youyong Li<sup>\*,§</sup>

<sup>†</sup>*Department of General Education, Wuxi University, Wuxi 214105, China*

<sup>‡</sup>*School of Physics, Sun Yat-Sen University, Guangzhou, China*

<sup>¶</sup>*Department of Applied Physics, Nanjing University of Information Science&Technology,  
Nanjing 210044, China*

<sup>§</sup>*Institute of Functional Nano&Soft Materials (FUNSOM), Jiangsu Key Laboratory for  
Carbon-Based Functional Materials&Devices, Soochow University, Suzhou, 215123, China*

E-mail: huanganq8@mail2.sysu.edu.cn; qingfangli@nuist.edu.cn; yyli@suda.edu.cn

## Calculation method for in-plane linear dichroism (LD)

$$LD = \frac{\varepsilon_2(x) - \varepsilon_2(y)}{\varepsilon_2(x) + \varepsilon_2(y)} \quad (1)$$

## Carrier mobility calculation

In 2D the carrier mobility is given by the expression,<sup>1</sup>

$$\mu_{2D} = \frac{e\hbar^3 C_{2D}}{k_B T m_e^* m_d (E_1^i)^2} \quad (2)$$

where  $m_e^*$  is the effective mass in the transport direction and  $m_d$  is the average effective mass determined by  $m_d = \sqrt{m_x^* m_y^*}$ . The term  $E_1$  represents the deformation potential constant of the valence-band minimum for hole or conduction-band maximum for electron along the transport direction, defined by  $E_1^i = \Delta V_i / (\Delta l / l_0)$ . Here  $\Delta V_i$  is the energy change of the  $i^{th}$  band under proper cell compression and dilatation,  $l_0$  is the lattice constant in the transport direction and  $\Delta l$  is the deformation of  $l_0$ . The elastic modulus  $C_{2D}$  of the longitudinal strain in the propagation directions (both  $x$  and  $y$ ) of the longitudinal acoustic wave is derived from  $(E - E_0) / S_0 = C(\Delta l / l_0)^2 / 2$ , where  $E$  is the total energy and  $S_0$  is the lattice volume at equilibrium for a 2D system. The temperature used for the mobility calculations was 300 K.

## Details for Real-time approach to nonlinear optical properties

Nonlinear optical properties are obtained within the real-time (RT) approach developed by Attaccalite et.al.<sup>2-4</sup> In this approach the time-dependent Schrödinger equation is integrated to obtain the time-dependent valence states  $|v_{m\mathbf{k}}\rangle$ , shown as:

$$i\hbar \frac{d}{dt} |v_{m\mathbf{k}}\rangle = \left( H_{\mathbf{k}}^{\text{sys}} + i\mathcal{E} \cdot \tilde{\partial}_{\mathbf{k}} \right) |v_{m\mathbf{k}}\rangle \quad (3)$$

Herein,  $H_{\mathbf{k}}^{\text{sys}}$  is the system Hamiltonian—which is discussed later;  $\mathcal{E} \cdot \tilde{\partial}_{\mathbf{k}}$  describes the coupling with the external field in the dipole approximation. While the Born-vonarmar periodic

boundary conditions are imposed, the coupling takes the form of a  $\mathbf{k}$ -derivative operator  $\tilde{\partial}_{\mathbf{k}}$ . The tilde indicates that the operator is ‘gauge covariant’ and guarantees that the solutions of eqn (1) are invariant under unitary rotations among occupied states at  $\mathbf{k}$ .

From  $|v_{m\mathbf{k}}\rangle$ , the time-dependent polarization of the system  $P_{\parallel}$  along the lattice vector  $\mathbf{a}$  is calculated as,

$$P_{\parallel} = -\frac{ef}{2\pi\nu N_{\mathbf{k}_{\perp}}} \sum_{\mathbf{k}_{\perp}} \text{Im} \log \prod_{\mathbf{k}_{\perp}}^{N_{\mathbf{k}_{\parallel}}-1} \det S(\mathbf{k}, \mathbf{k} + \mathbf{q}_{\parallel}) \quad (4)$$

where  $S(\mathbf{k}, \mathbf{k} + \mathbf{q}_{\parallel})$  is the overlap matrix between  $|v_{n\mathbf{k}}\rangle$  and  $|v_{m\mathbf{k}+\mathbf{q}_{\parallel}}\rangle$ . Furthermore,  $\nu$  is the unit cell volume,  $f$  is the spin degeneracy,  $N_{\mathbf{k}_{\perp}}$  and  $N_{\mathbf{k}_{\parallel}}$  are respectively the number of  $\mathbf{k}$  points along and perpendicular to the polarization direction, and  $\mathbf{q}_{\parallel} = 2\pi/(N_{\mathbf{k}_{\parallel}}\mathbf{a})$ . Finally, the second harmonic coefficient is extracted from the power series of the polarization in the laser field  $\mathcal{E}$ ,  $\mathbf{P} = \chi^{(1)}\mathcal{E} + \chi^{(2)}\mathcal{E}\mathcal{E} + \chi^{(3)}\mathcal{E}\mathcal{E}\mathcal{E} + \dots$

In eqn (1), the model Hamiltonian chosen for  $H_{\mathbf{k}}^{\text{sys}}$  determines the level of approximation in the description of correlation effects in the SHG spectra. In this work, two different models for the system Hamiltonian are adopted: (i) the independent-particle approximation (IPA) model and (ii) the real-time GW + BSE model. In IPA, the system Hamiltonian is simply evaluated from the Kohn-Sham DFT Hamiltonian with  $G_0W_0$  corrections,

$$H_{\mathbf{k}}^{\text{sys}} = H_{\mathbf{k}}^{\text{DFT}} + \sum_{n\mathbf{k}} \Delta_{n\mathbf{k}} |v_{n\mathbf{k}}^0\rangle \langle v_{n\mathbf{k}}^0| \quad (5)$$

where  $\Delta_{n\mathbf{k}} = E_{n\mathbf{k}}^{\text{G}_0\text{W}_0} - E_{n\mathbf{k}}^{\text{DFT}}$ . This model is named as IPA- $G_0W_0$  for simplicity in the main text. In RT-GW+BSE model,

$$H_{\mathbf{k}}^{\text{sys}} = H_{\mathbf{k}}^{\text{DFT}} + \sum_{n\mathbf{k}} \Delta_{n\mathbf{k}} |v_{n\mathbf{k}}^0\rangle \langle v_{n\mathbf{k}}^0| + V_h(\mathbf{r})[\Delta\rho] + \Sigma_{\text{SEX}}[\Delta\gamma] \quad (6)$$

where  $\Delta\rho \equiv \rho(\mathbf{r}; t) - \rho(\mathbf{r}; t = 0)$  is the variation of the electronic density and  $\Delta\gamma \equiv \gamma(\mathbf{r}, \mathbf{r}'; t) - \gamma(\mathbf{r}, \mathbf{r}'; t = 0)$  is the variation of the density matrix induced by the external field  $\mathcal{E}$ .  $V_h(\mathbf{r})[\Delta\rho]$  is the Hartree potential and is responsible for the local-field effects orig-

inating from system inhomogeneities. The last term  $\Sigma_{\text{SEX}}[\Delta\gamma]$ , is the screened-exchange self-energy that accounts for the electron-hole interaction, and is given by the convolution between the screened interaction  $W$  and  $\Delta\gamma$ . In the linear response limit, the GW+BSE model reproduces the optical absorption calculated by solving the Bethe-Salpeter equation.<sup>5</sup> This model is named as RT- $G_0W_0$ +BSE for simplicity in the main text.

For eqn.(1), it can be numerically solved for  $|v_{n\mathbf{k}}\rangle$  using the following algorithm developed by Crank and Nicholson<sup>6</sup> for both Hermitian and non-Hermitian type Hamiltonians:

$$|v_{n\mathbf{k}}(t + \Delta t)\rangle = \frac{I - i(\Delta t/2)H_{\mathbf{k}}^{\text{sys}}(t)}{I + i(\Delta t/2)H_{\mathbf{k}}^{\text{sys}}(t)}|v_{n\mathbf{k}}(t)\rangle, \quad (7)$$

in which  $I$  is the identity element. The operation is strictly unitary for any value of time-step  $\Delta t$ . It turns out that if the applied field is a Dirac  $\delta$ -type, the Fourier transformed responses can be evaluated at all frequencies. In our simulations, we switch on the monochromatic field at  $t = t_0$ . This sudden switch excites the eigenfrequencies of the system introducing spurious contributions to the nonlinear response. An imaginary term is added into the Hamiltonian to simulate a finite dephasing,

$$\Gamma = -\frac{i}{\gamma_{\text{deph}}} \sum_l \{|v_{\mathbf{k},l}\rangle\langle v_{\mathbf{k},l}| - |v_{\mathbf{k},l}^0\rangle\langle v_{\mathbf{k},l}^0|\}, \quad (8)$$

where  $|v_{\mathbf{k},l}^0\rangle$  are the valence bands of the unperturbed system and  $\gamma_{\text{deph}}$  is the dephasing rate. Then we run the simulations for a time much larger than  $1/\gamma_{\text{deph}}$  and sample  $\mathbf{P}(t)$  close to the end of the simulation. Since  $\gamma_{\text{deph}}$  determines also the spectral broadening, we cannot choose it arbitrary small. The smaller the dephasing rate is, the longer the simulation is. As an empirical parameter, the dephasing time  $1/\gamma_{\text{deph}}$  is usually set as 6.6 fs, which corresponds to a spectral broadening of approximately 0.2 eV.<sup>2-4,7</sup>

**Atomic structures of TaOX<sub>2</sub> (X= F, Cl, Br) in POSCAR format**

NbOF<sub>2</sub>

1.0000000000000000

5.9589295282229271 0.0000000000000001 0.0000000000000000

0.0000000000000002 3.8562482713380097 0.0000000000000000

0.0000000000000015 0.0000000000000017 27.0550994873000015

Ta F O

2 4 2

Direct

0.7272166138750078 0.5065854657273899 0.5000000000000000

0.2727833861249992 0.5065854657273899 0.5000000000000000

0.0000000000000000 0.5064833837409241 0.4498436831611033

0.0000000000000000 0.5064833837409241 0.5501562868389013

0.5000000000000000 0.5064821016318977 0.4406933403510152

0.5000000000000000 0.5064821016318977 0.5593066596489846

0.7417864083289866 0.0064489998997628 0.5000000000000000

0.2582135916710064 0.0064489998997628 0.5000000000000000

NbOCl<sub>2</sub>

1.0000000000000000

6.6921271756453855 0.0000000000000001 0.0000000000000000

0.0000000000000002 3.8661596365884625 0.0000000000000000

0.0000000000000016 0.0000000000000017 27.0550994873000015

Ta Cl O

2 4 2

Direct

0.7188298749474966 0.5064427399649923 0.5000000000000000

0.2811701250525034 0.5064427399649923 0.5000000000000000  
0.0000000000000000 0.5066805516785291 0.4374138333765113  
0.0000000000000000 0.5066805516785291 0.5625861366234932  
0.5000000000000000 0.5064925208409123 0.4273550798140172  
0.5000000000000000 0.5064925208409123 0.5726449201859827  
0.7299756231114535 0.0063841385155264 0.5000000000000000  
0.2700243768885394 0.0063841385155264 0.5000000000000000

NbOBr<sub>2</sub>

1.0000000000000000  
7.0136880660190224 0.0000000000000001 0.0000000000000000  
0.0000000000000002 3.8728948864501733 0.0000000000000000  
0.0000000000000017 0.0000000000000017 27.0550994873000015

Ta Br O

2 4 2

Direct

0.7135640477048887 0.5062887180025938 0.5000000000000000  
0.2864359522951186 0.5062887180025938 0.5000000000000000  
0.0000000000000000 0.5070013319942356 0.4338769794962093  
0.0000000000000000 0.5070013319942356 0.5661229905037954  
0.5000000000000000 0.5062123194983020 0.4214886079975039  
0.5000000000000000 0.5062123194983020 0.5785113920024962  
0.7228115917284773 0.0064975815048644 0.5000000000000000  
0.2771884082715155 0.0064975815048644 0.5000000000000000

Table S 1: The calculated elastic constants of TaOX<sub>2</sub> (X= F, Cl, Br) in unit of GPa.

|          | TaOF <sub>2</sub> | TaOCl <sub>2</sub> | TaOBr <sub>2</sub> |
|----------|-------------------|--------------------|--------------------|
| $C_{11}$ | 87.43             | 57.276             | 73.64              |
| $C_{12}$ | -11.21            | 0.889              | 1.58               |
| $C_{22}$ | 319.47            | 253.774            | 254.37             |
| $C_{66}$ | 14.71             | 16.633             | 17.57              |

Table S 2: The calculated carrier effective masses  $m^*$  ( $m_0$ ), deformation potential  $E_1$  (eV), in-plane stiffness  $C_{2D}$  (N/m), and mobility  $\mu$  (cm<sup>2</sup>·V<sup>-1</sup>·s<sup>-1</sup>) for electron (e) and hole (h) along the  $x$  and  $y$  directions in monolayer TaOX<sub>2</sub> (X= F, Cl, Br) at 300 K.

| Carrier |                    | $m_x^*$ | $m_y^*$ | $E_{1x}$ | $E_{1y}$ | $C_{2D\_x}$ | $C_{2D\_y}$ | $\mu_x$ | $\mu_y$ |
|---------|--------------------|---------|---------|----------|----------|-------------|-------------|---------|---------|
| $e$     | TaOF <sub>2</sub>  | 4.81    | 0.45    | 7.50     | 3.77     | 78.64       | 306.03      | 0.42    | 68.9    |
|         | TaOCl <sub>2</sub> | 1.69    | 0.41    | 1.66     | 3.88     | 70.52       | 268.31      | 22.1    | 110.4   |
|         | TaOBr <sub>2</sub> | 1.15    | 0.45    | 0.74     | 3.79     | 70.00       | 263.06      | 2458    | 898     |
| $h$     | TaOF <sub>2</sub>  | -12.27  | -8.62   | 1.98     | 1.30     | 78.64       | 306.03      | 0.34    | 4.3     |
|         | TaOCl <sub>2</sub> | -9.54   | -7.57   | 1.30     | 0.39     | 70.52       | 268.31      | 1.63    | 57.8    |
|         | TaOBr <sub>2</sub> | -8.66   | -4.69   | 3.37     | 0.88     | 70.00       | 263.06      | 23.8    | 24.4    |

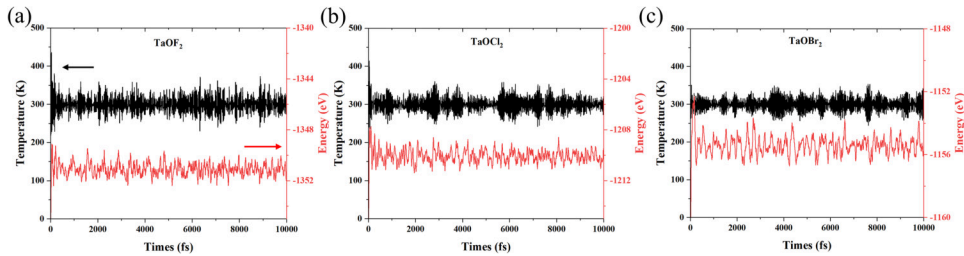

Figure S 1: Energy and temperature variations at 300 K from AIMD simulations within 4×5×1 supercell for TaOX<sub>2</sub> monolayers.

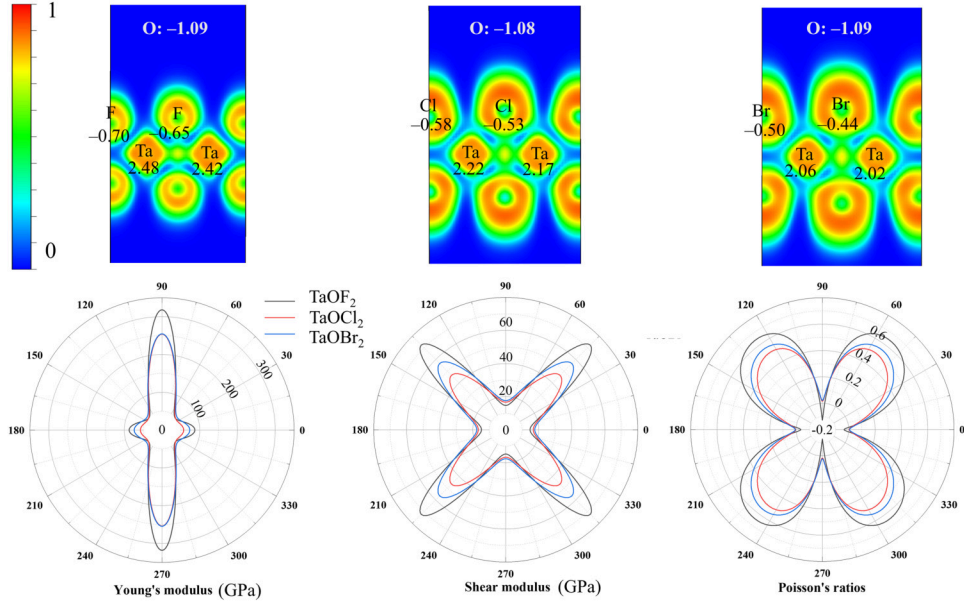

Figure S 2: Plot of electron localization function (ELF), Young's modulus, Shear modulus in unit of GPa and Poisson's ratio of  $\text{TaOX}_2$  monolayers.

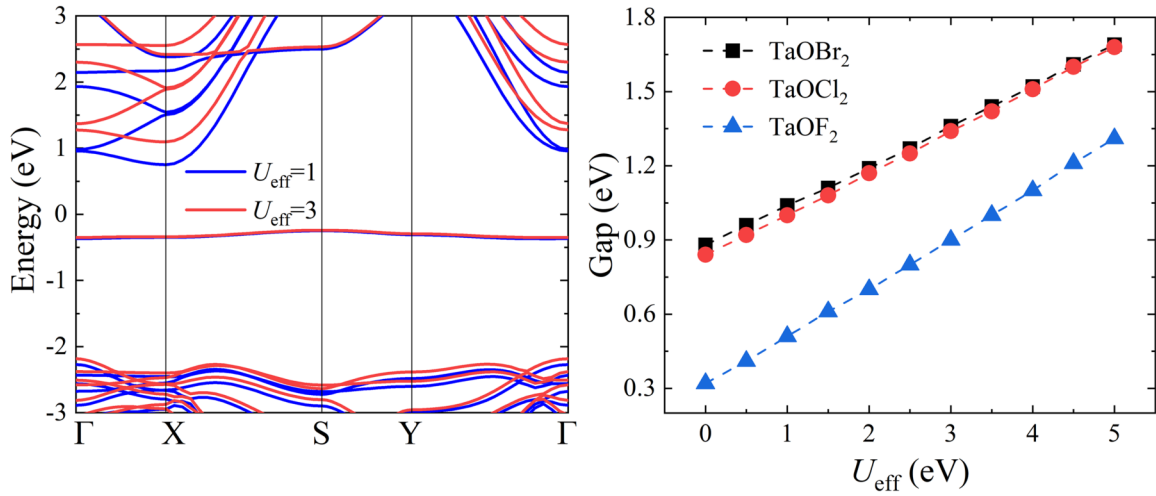

Figure S 3: Calculated band structures of  $\text{TaOCl}_2$  from GGA+U method with different values of  $U_{\text{eff}}$  and  $U_{\text{eff}}$ -dependent variations of band gap for  $\text{TaOX}_2$  monolayers.

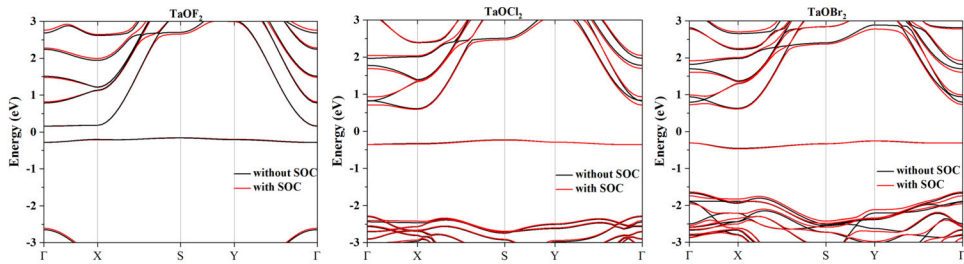

Figure S 4: Band structures with and without spin-orbit interactions for  $\text{TaOX}_2$ .

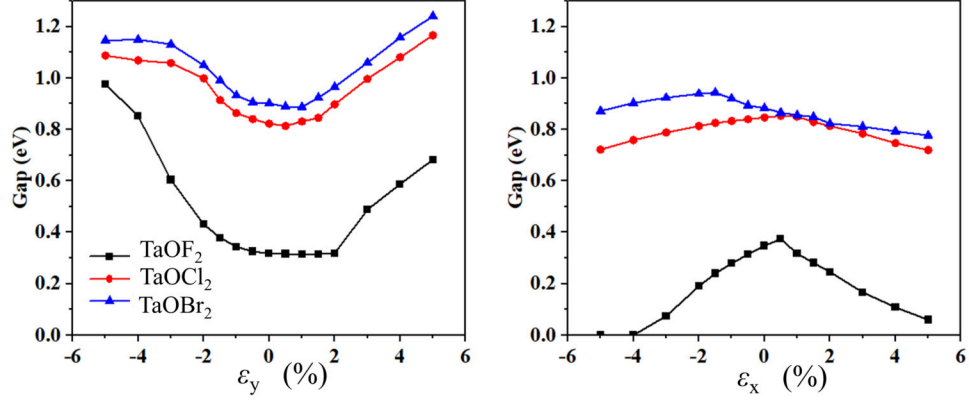

Figure S 5: Strain-dependent variations of band gap under X and Y direction of  $\text{TaOX}_2$ .

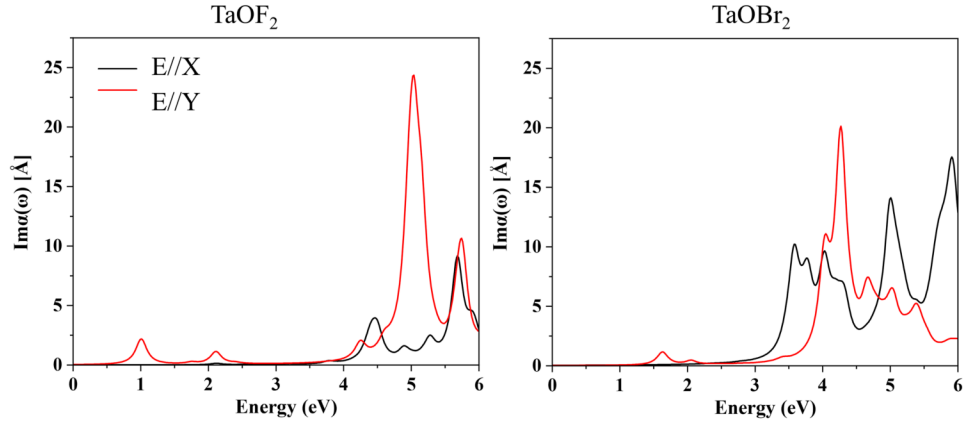

Figure S 6: Imaginary part of dielectric function of  $\text{TaOF}_2$  and  $\text{TaOBr}_2$ .

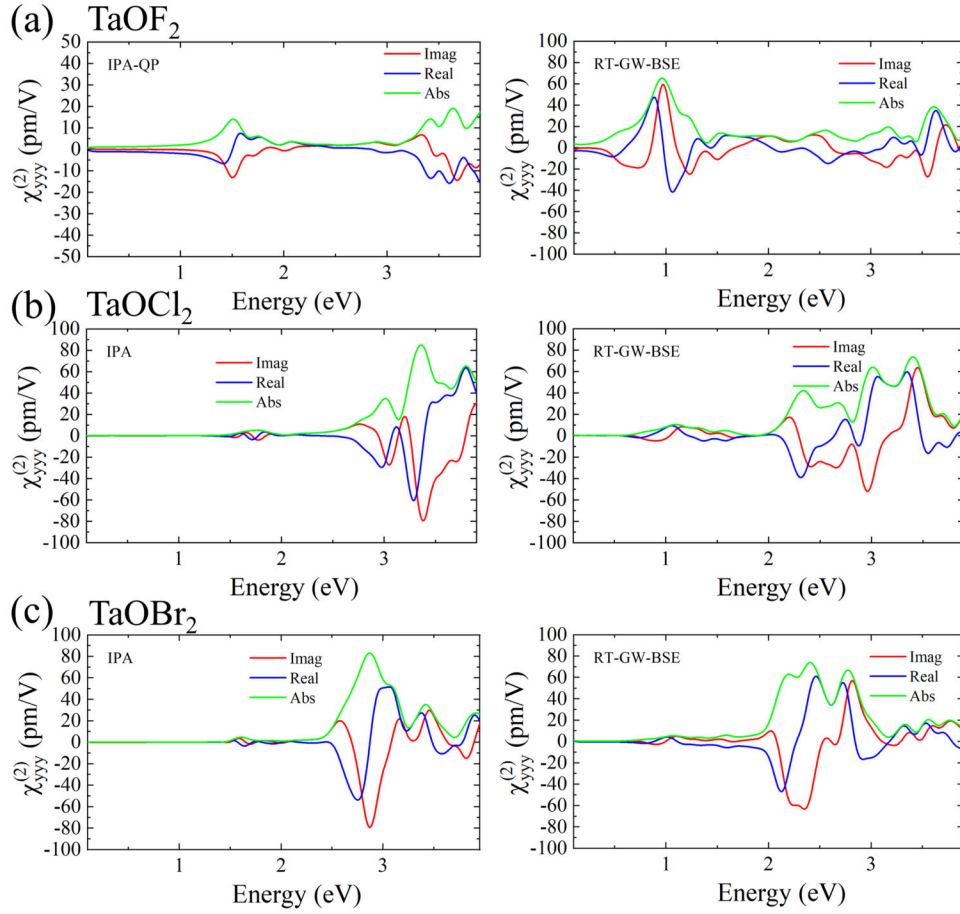

Figure S 7: Calculated SHG components  $\chi_{yyy}^{(2)}$  at RT-IPA and RT- $G_0W_0$ +BSE of  $TaOX_2$ .

## References

- (1) Qiao, J.; Kong, X.; Hu, Z.-X.; Yang, F.; Ji, W. High-mobility transport anisotropy and linear dichroism in few-layer black phosphorus. *Nature communications* **2014**, *5*, 4475.
- (2) Attaccalite, C.; Grüning, M. Nonlinear Optics from an *Ab Initio* Approach by Means of the Dynamical Berry Phase: Application to Second- and Third-Harmonic Generation in Semiconductors. *Physical Review B* **2013**, *88*, 235113.
- (3) Grüning, M.; Attaccalite, C. Second Harmonic Generation in h-BN and MoS<sub>2</sub> Monolayers: Role of Electron-Hole Interaction. *Physical Review B* **2014**, *89*, 081102.
- (4) Attaccalite, C.; Nguer, A.; Cannuccia, E.; Grüning, M. Strong Second Harmonic Generation in SiC, ZnO, GaN Two-Dimensional Hexagonal Crystals from First-Principles Many-Body Calculations. *Physical Chemistry Chemical Physics* **2015**, *17*, 9533–9540.
- (5) Attaccalite, C.; Grüning, M.; Marini, A. Real-time approach to the optical properties of solids and nanostructures: Time-dependent Bethe-Salpeter equation. *Physical Review B* **2011**, *84*, 245110.
- (6) Crank, J.; Nicolson, P. A practical method for numerical evaluation of solutions of partial differential equations of the heat-conduction type. *Mathematical Proceedings of the Cambridge Philosophical Society*. 1947; pp 50–67.
- (7) Mishra, H.; Bhattacharya, S. Exciton-Driven Giant Nonlinear Overtone Signals from Buckled Hexagonal Monolayer GaAs. *Physical Review B* **2020**, *101*, 155132.
